# Supplementary material for: A critical comparison between an ultra-high-performance liquid chromatography triple quadrupole mass spectrometry (UHPLC-QqQ-MS) method and an enzyme assay for anti-cholinesterase pesticide residue detection in cereal matrices
Source: Royal Society of Chemistry journal article supplement (doi:10.1039/d2ay00355d), 2022-01-01
Supplement: d2ay00355d1.pdf [file d2ay00355d1.pdf]

## Supplementary Materials

**A critical comparison between an ultra-high-performance liquid chromatography triple quadrupole mass spectrometry (UHPLC-QqQ-MS) method and an enzyme assay for anti-cholinesterase pesticide residue detection in cereal matrices**

**A. S. Tsagkaris<sup>a\*</sup>, L. Uttl<sup>a</sup>, Z. Dzuman<sup>a</sup>, J. Pulkrabova<sup>a</sup>, J. Hajslova<sup>a\*</sup>**

- a. Department of Food Analysis and Nutrition, Faculty of Food and Biochemical Technology, University of Chemistry and Technology Prague, Technická 5, 166 28 Prague 6 – Dejvice, Prague, Czech Republic

Corresponding authors: [jana.hajslova@vscht.cz](mailto:jana.hajslova@vscht.cz) & [tsagkara@vscht.cz](mailto:tsagkara@vscht.cz)

## 1. Tuning

**Table S1.** Analyte dependent parameters during tuning process.

| Analyte      | Precursor                | Product | CE | Abundance |
|--------------|--------------------------|---------|----|-----------|
| chlorpyrifos | 349.9 [M+H] <sup>+</sup> | 96.7    | 40 | 6919790   |
|              | 349.9 [M-H] <sup>+</sup> | 197.8   | 24 | 6455688   |
|              | 351.9 [M-H] <sup>-</sup> | 199.9   | 20 | 5504219   |
|              | 224.1 [M-H] <sup>+</sup> | 167.1   | 8  | 493497    |
|              | 224.1 [M-H] <sup>+</sup> | 109     | 20 | 471592    |
| bendiocarb   | 224.1 [M-H] <sup>+</sup> | 81      | 38 | 276557    |
|              | 224.1 [M-H] <sup>+</sup> | 59.2    | 24 | 65669     |
|              | 221.0 [M-H] <sup>+</sup> | 109     | 20 | 852331    |
|              | 221.0 [M-H] <sup>+</sup> | 79      | 30 | 147101    |
| dichlorvos   | 221.0 [M-H] <sup>+</sup> | 127     | 20 | 76516     |
|              | 221.0 [M-H] <sup>+</sup> | 94.7    | 32 | 2118      |

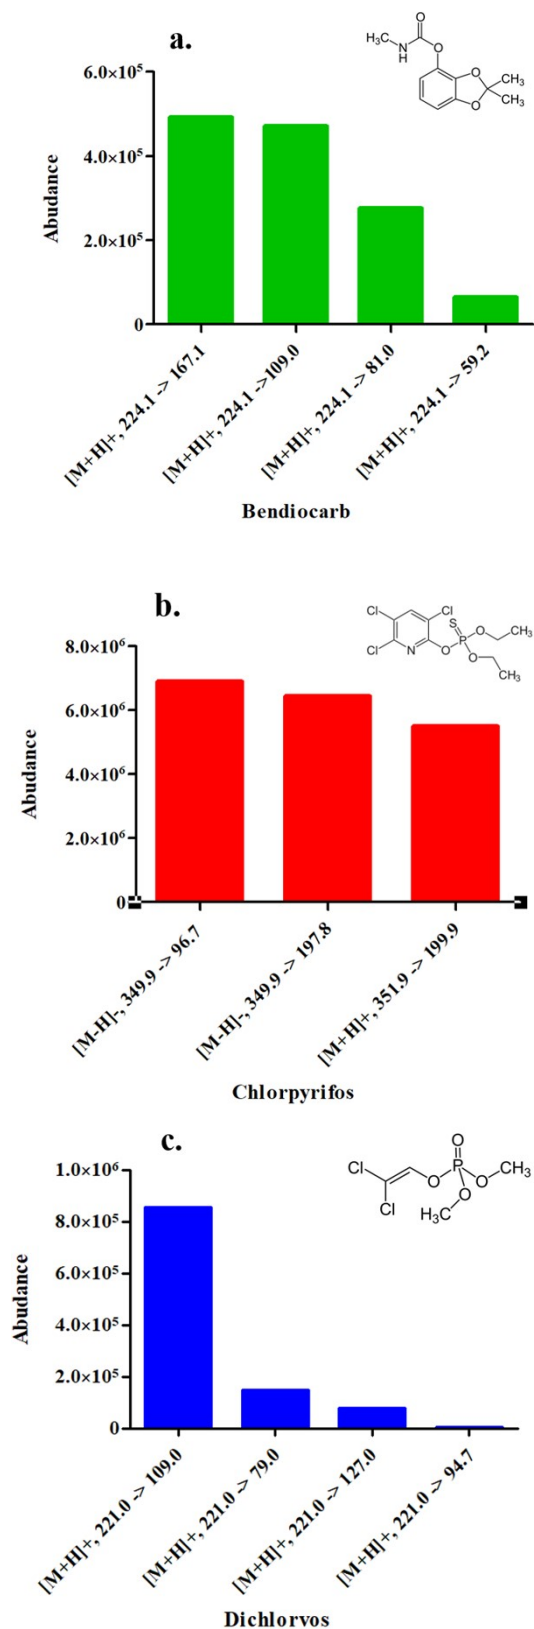

**Figure S1.** Selection of the most abundant transitions for a. bendiocarb, b. chlorpyrifos and c. dichlorvos. The same process was followed to obtain the optimum conditions for all the analytes (see Table S2).

## 2. Targeted pesticide residue list

**Table S2.** Analyte dependent parameters of the UHPLC-QqQ-MS method in the ESI+ mode.

| No | Analyte                  | logP  | Retention time [min] | Precursor ion [ <i>m/z</i> ]                         | Product ions [ <i>m/z</i> ] | CE (V) |
|----|--------------------------|-------|----------------------|------------------------------------------------------|-----------------------------|--------|
| 1  | Acephate                 | -0.85 | 2.44                 | 184.1 [M+H] <sup>+</sup>                             | 143.0/49.0                  | 8/16   |
| 2  | Aldicarb                 | 1.1   | 4.07                 | 208.0 [M+NH <sub>4</sub> ] <sup>+</sup>              | 116.0/89.1                  | 4/16   |
| 3  | Aldicarb-sulfone         | -0.6  | 2.66                 | 240.1 [M+NH <sub>4</sub> ] <sup>+</sup>              | 148.1/86.1                  | 12/24  |
| 4  | Aldicarb-sulfoxide       | -0.2  | 2.57                 | 207.1 [M+H] <sup>+</sup>                             | 132.0/89.1                  | 4/13   |
| 5  | Azinphos-ethyl           | 3.4   | 8.05                 | 346.1 [M+H] <sup>+</sup>                             | 132.1/77.0                  | 18/44  |
| 6  | Azinphos-methyl          | 2.8   | 6.52                 | 318.08 [M+H] <sup>+</sup>                            | 132.1/77.0                  | 44/64  |
| 7  | Bendiocarb               | 1.7   | 4.67                 | 224.1 [M+H] <sup>+</sup>                             | 167.1/109.0                 | 8/20   |
| 8  | Cadusafos                | 3.3   | 9.84                 | 271.0 [M+H] <sup>+</sup>                             | 215.0/159.0                 | 8/12   |
| 9  | Carbaryl                 | 2.4   | 5.02                 | 202.0 [M+H] <sup>+</sup>                             | 144.9/127.1                 | 8/34   |
| 10 | Carbofuran               | 2.3   | 4.75                 | 222.1 [M+H] <sup>+</sup>                             | 165.1/123.1                 | 10/22  |
| 11 | Carbofuran-3-hydroxy     | 1.2   | 3.32                 | 255.1 [M+NH <sub>4</sub> ] <sup>+</sup>              | 220.0/163.1                 | 8/20   |
| 12 | Carbophenothion          | 5.3   | 11.26                | 345.0 [M+H]/343.0 [M+H]                              | 159.0/57.0                  | 12/12  |
| 13 | Chlorbufam               | 3.1   | 7.85                 | 241.0 [M+NH <sub>4</sub> ] <sup>+</sup> /226.0 [M+H] | 154.0/174.0                 | 40/16  |
| 14 | Chlorfenvinphos          | 3.1   | 9.15                 | 361.0 [M+H] <sup>+</sup> /359.0 [M+H] <sup>-</sup>   | 155.1/155.1                 | 10/8   |
| 15 | Chlorpropham             | 3.5   | 5.95                 | 214.0 [M+H]                                          | 172.0/154.0                 | 16/24  |
| 16 | Chlorpyrifos             | 5.3   | 10.97                | 349.9 [M+H] <sup>-</sup>                             | 198.8/96.7                  | 24/40  |
| 17 | Chlorpyrifos-methyl      | 4.3   | 9.70                 | 323.9 [M+H] <sup>+</sup> /321.9 [M+H] <sup>-</sup>   | 125/125                     | 22/20  |
| 18 | Demeton-S-methyl         | 1     | 4.88                 | 231.0 [M+H] <sup>+</sup>                             | 89.1/61.0                   | 12/36  |
| 19 | Demeton-S-methyl-sulfone | -0.3  | 2.81                 | 263.1 [M+H] <sup>+</sup>                             | 169.1/109                   | 16/36  |
| 20 | Desmedipham              | 3.4   | 6.25                 | 300.9 [M+H] <sup>+</sup>                             | 181.8/135.7                 | 4/20   |
| 21 | Diazinon                 | 3.8   | 9.20                 | 305.1 [M+H] <sup>+</sup>                             | 169.1/96.9                  | 22/44  |
| 22 | Dichlorvos               | 1.4   | 4.59                 | 221.0 [M+H]                                          | 109.0/79.0                  | 20/20  |
| 23 | Dicrotophos              | 0     | 2.98                 | 238.1 [M+H] <sup>+</sup>                             | 112.1/72.1                  | 10/26  |
| 24 | Diethofencarb            | 2.8   | 6.91                 | 268.1 [M+H] <sup>+</sup>                             | 226.1/124.0                 | 8/36   |
| 25 | Dimethoate               | 0.8   | 3.41                 | 230.1 [M+H] <sup>+</sup>                             | 199.0/125.1                 | 8/20   |
| 26 | Disulfoton               | 4     | 9.66                 | 275.0 [M+H] <sup>+</sup>                             | 89.0/61.0                   | 5/40   |
| 27 | Disulfoton-sulfone       | 1.9   | 5.66                 | 307.0 [M+H] <sup>+</sup>                             | 124.9/96.9                  | 16/32  |
| 28 | Disulfoton-sulfoxide     | 1.7   | 5.51                 | 291.1 [M+H] <sup>+</sup>                             | 213.0/185.2                 | 8/12   |
| 29 | EPN                      | 4.4   | 9.79                 | 324.0 [M+NH <sub>4</sub> ] <sup>+</sup>              | 296.1/157                   | 12/26  |
| 30 | Ethiofencarb             | 1.9   | 5.34                 | 226.1 [M+H] <sup>+</sup>                             | 163.9/107.0                 | 4/20   |
| 31 | Ethion                   | 5.1   | 10.86                | 385.0 [M+H] <sup>+</sup>                             | 199.0/143.0                 | 8/24   |
| 32 | Fenamiphos               | 3.2   | 8.49                 | 304.1 [M+H] <sup>+</sup>                             | 217.0/202.0                 | 24/44  |
| 33 | Fenamiphos-sulfone       | 2     | 4.88                 | 336.1 [M+H] <sup>+</sup>                             | 308.1/266.0                 | 16/16  |
| 34 | Fenamiphos-sulfoxide     | 1.8   | 4.71                 | 320.1 [M+H] <sup>+</sup>                             | 233.1/108.1                 | 28/44  |
| 35 | Fenobucarb               | 2.8   | 6.58                 | 208.1 [M+H] <sup>+</sup>                             | 77.1/95.0                   | 44/16  |
| 36 | Fenoxycarb               | 4.3   | 8.37                 | 302.1 [M+H] <sup>+</sup>                             | 116.1/88.1                  | 8/16   |
| 37 | Fensulfothion            | 2.2   | 5.85                 | 309.1 [M+H] <sup>+</sup>                             | 281.0/253.0                 | 12/16  |
| 38 | Fensulfothion-oxon       | 1.4   | 3.75                 | 293.1 [M+H] <sup>+</sup>                             | 265.1/237.0                 | 12/20  |
| 39 | Fensulfothion-PO-sulfone | 1.5   | 3.92                 | 309.0 [M+H] <sup>+</sup>                             | 253.0/175.0                 | 16/32  |
| 40 | Fensulfothion-sulfone    | 2.6   | 6.08                 | 325.0 [M+H] <sup>+</sup>                             | 269.0/191.0                 | 12/24  |
| 41 | Fenthion                 | 4.1   | 8.91                 | 279.1 [M+H] <sup>+</sup>                             | 247.0/169.0                 | 12/18  |
| 42 | Fenthion-sulfone         | 2.8   | 5.12                 | 311.1 [M+H] <sup>+</sup>                             | 137.1/125.0                 | 16/24  |
| 43 | Fenthion-sulfoxide       | 2.7   | 4.87                 | 295.0 [M+H] <sup>+</sup>                             | 280.1/109.1                 | 20/36  |

|    |                            |      |       |                                         |                   |          |
|----|----------------------------|------|-------|-----------------------------------------|-------------------|----------|
| 44 | Fonofos                    | 3.9  | 8.98  | 247.1 [M+H] <sup>+</sup>                | 137.0/109.0       | 8/22     |
| 45 | Formetanate                | 1.2  | 2.46  | 222.0 [M+H] <sup>+</sup>                | 165.1/120.0       | 12/32    |
| 46 | Formothion                 | 1.5  | 4.19  | 258.0 [M+H] <sup>+</sup>                | 199.0/170.9       | 4/12     |
| 47 | Fosthiazate                | 2.0  | 5.44  | 284.2 [M+H] <sup>+</sup>                | 228.0/104.0       | 8/24     |
| 48 | Furathiocarb               | 4.7  | 10.55 | 383.2 [M+H] <sup>+</sup>                | 195.0/167.0       | 16/24    |
| 49 | Heptenophos                | 1.3  | 6.10  | 251.0 [M+H] <sup>+</sup>                | 127.0/124.9       | 24/20    |
| 50 | Iprovalicarb               | 3.7  | 8.03  | 321.2 [M+H] <sup>+</sup>                | 203.1/119.1       | 4/20     |
| 51 | Isofenfos-methyl           | 3.3  | 8.90  | 332.1 [M+H] <sup>+</sup>                | 273.0/230.9       | 4/12     |
| 52 | Isofenphos                 | 4.1  | 9.50  | 346.1 [M+H] <sup>+</sup>                | 244.9/216.9       | 10/24    |
| 53 | Isoprocarb                 | 2.3  | 5.73  | 194.2 [M+H] <sup>+</sup>                | 137.1/95.0        | 6/14     |
| 54 | Malaoxon                   | 0.6  | 4.79  | 315.0 [M+H] <sup>+</sup>                | 126.9/99.0        | 12/28    |
| 55 | Malathion                  | 2.4  | 7.55  | 331.0 [M+H] <sup>+</sup>                | 284.9/126.8       | 4/8      |
| 56 | Mecarbam                   | 2.4  | 8.05  | 330.0 [M+H] <sup>+</sup>                | 227.0/97.1        | 4/48     |
| 57 | Methacrifos                | 1.9  | 6.60  | 241.0 [M+H] <sup>+</sup>                | 209.1/125.0       | 6/20     |
| 58 | Methamidophos              | -0.9 | 2.10  | 141.9 [M+H] <sup>+</sup>                | 125.0/94.1        | 12/16    |
| 59 | Methidathion               | 2.4  | 6.36  | 302.9 [M+H] <sup>+</sup>                | 145.0/85.0        | 4/24     |
| 60 | Methiocarb                 | 2.9  | 6.96  | 226.1 [M+H] <sup>+</sup>                | 169.0/120.9       | 8/18     |
| 61 | Methiocarb-sulfone         | 1.6  | 3.38  | 275.1 [M+NH <sub>4</sub> ] <sup>+</sup> | 122.0/107.0       | 24/52    |
| 62 | Methiocarb-sulfoxide       | 1.5  | 3.17  | 242.0 [M+H] <sup>+</sup>                | 185.1/122.1       | 12/32    |
| 63 | Methomyl                   | 0.6  | 2.81  | 162.9 [M+H] <sup>+</sup>                | 106.1/88.1        | 8/6      |
| 64 | Metolcarb                  | 1.7  | 4.32  | 166.1 [M+H] <sup>+</sup>                | 108.9/93.9        | 8/36     |
| 65 | Mevinphos (sum of isomers) | 1.2  | 2.89  | 225.0 [M+H] <sup>+</sup>                | 193.1/127.0       | 4/16     |
| 66 | Molinate                   | 3.2  | 7.48  | 188.1 [M+H] <sup>+</sup>                | 55.1/126.1        | 28/12    |
| 67 | Monocrotophos              | -0.2 | 2.89  | 224.1 [M+H] <sup>+</sup>                | 193.0/127.0       | 4/16     |
| 68 | Omethoate                  | -0.9 | 2.53  | 214.1 [M+H] <sup>+</sup>                | 183.0/125.0       | 8/24     |
| 69 | Oxamyl                     | -0.5 | 2.66  | 237.0 [M+NH <sub>4</sub> ] <sup>+</sup> | 90.1/72.1         | 4/10     |
| 70 | Phenmedipham               | 3.6  | 6.41  | 318.1 [M+NH <sub>4</sub> ] <sup>+</sup> | 168.1/136.0       | 12/28    |
| 71 | Phenthoate                 | 3.7  | 8.7   | 321.0 [M+H] <sup>+</sup>                | 247.0/135.0       | 8/24     |
| 72 | Phorate                    | 3.6  | 9.34  | 261.0 [M+H] <sup>+</sup>                | 199.0/75.1        | 4/8      |
| 73 | Phorate-sulfone            | 2.0  | 5.71  | 310.0 [M+NH <sub>4</sub> ] <sup>+</sup> | 171.0/96.9        | 12/40    |
| 74 | Phorate-sulfoxide          | 1.8  | 5.55  | 277.0 [M+H] <sup>+</sup>                | 142.8/96.9        | 20/44    |
| 75 | Phosalone                  | 4.4  | 9.42  | 385.0 [M+NH <sub>4</sub> ] <sup>+</sup> | 182.0/110.9       | 18/40    |
| 76 | Phosmet                    | 2.8  | 6.58  | 317.9 [M+H] <sup>+</sup>                | 160.0/133.0       | 20/44    |
| 77 | Phosphamidon               | 1.3  | 4.31  | 300.1 [M+H] <sup>+</sup>                | 226.8/174.1       | 12/8     |
| 78 | Phoxim                     | 4.4  | 9.28  | 299.1 [M+H] <sup>+</sup>                | 129.1/77.1        | 10/36    |
| 79 | Pirimicarb                 | 1.7  | 4.52  | 239.1 [M+H] <sup>+</sup>                | 182.2/72.1        | 12/24    |
| 80 | Pirimicarb-desmethyl       | 1.6  | 3.26  | 225.1 [M+H] <sup>+</sup>                | 168.1/72.1        | 16/28    |
| 81 | Pirimiphos-ethyl           | 4.8  | 10.73 | 334.1 [M+H] <sup>+</sup>                | 198.0/182.1       | 20/24    |
| 82 | Pirimiphos-methyl          | 4.2  | 9.45  | 306.0 [M+H] <sup>+</sup>                | 164.2/108.1       | 24/32    |
| 83 | Profenofos                 | 4.7  | 10.25 | 374.9 [M+H] <sup>+</sup>                | 304.9/302.9       | 16/20    |
| 84 | Propamocarb                | 1.2  | 2.58  | 189.1 [M+H] <sup>+</sup>                | 102.0/74.2        | 20/32    |
| 85 | Propham                    | 2.6  | 5.72  | 180.1 [M+H] <sup>+</sup>                | 138.1/120.1       | 4/18     |
| 86 | Propoxur                   | 1.5  | 4.69  | 210.1 [M+H] <sup>+</sup>                | 168.1/111.1       | 4/16     |
| 87 | Prosulfocarb               | 3.9  | 10.16 | 252.1 [M+H] <sup>+</sup>                | 128.2/91.1        | 12/44    |
| 88 | Prothiofos                 | 4.9  | 12.0  | 344.9 [M+H] <sup>+</sup>                | 240.9/133.0       | 12/56    |
| 89 | Quinalphos                 | 4.4  | 8.8   | 299.0 [M+H] <sup>+</sup>                | 163.0/147.0       | 24/20    |
| 90 | Sulfotep                   | 3.9  | 8.89  | 323.0 [M+H] <sup>+</sup>                | 115.0/96.9        | 32/56    |
| 91 | Temephos                   | 6.0  | 10.61 | 467.0 [M+H] <sup>+</sup>                | 419.0/405.0/125.0 | 24/20/44 |
| 92 | Terbufos                   | 4.5  | 10.49 | 289.0 [M+H] <sup>+</sup>                | 103.0/57.0        | 6/26     |
| 93 | Terbufos-sulfone           | 2.5  | 6.86  | 321.1 [M+H] <sup>+</sup>                | 171.0/96.9        | 8/44     |
| 94 | Terbufos-sulfoxide         | 2.2  | 6.86  | 305.1 [M+H] <sup>+</sup>                | 187.0/96.9        | 8/52     |
| 95 | Thiodicarb                 | 1.7  | 5.3   | 355.0 [M+H] <sup>+</sup>                | 108.1/88.1        | 16/16    |
| 96 | Thiometon                  | 2.7  | 5.71  | 247.0 [M+H] <sup>+</sup>                | 89.1/61.0         | 6/40     |
| 97 | Vamidothion                | 0.3  | 3.29  | 288.1 [M+H] <sup>+</sup>                | 146.0/118.0       | 12/32    |

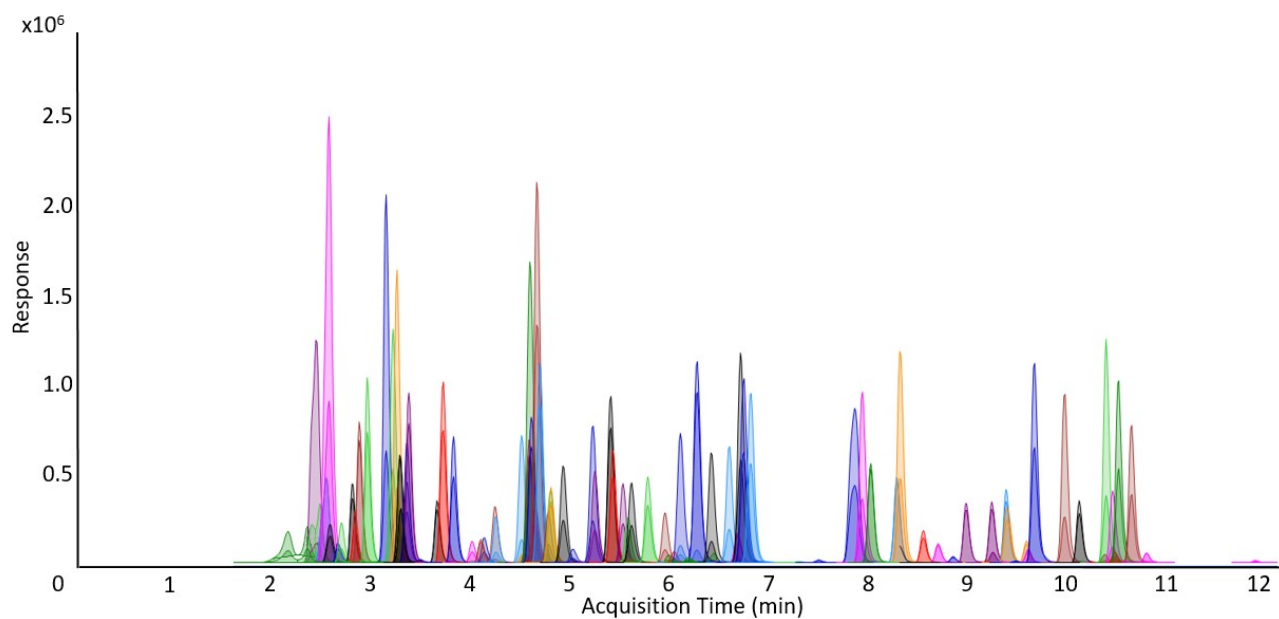

**Figure S2.** Extracted ion chromatogram (XIC) for the 97 analytes analyzed in matrix-matched standard at  $0.040 \text{ mg kg}^{-1}$ .

### 3. UHPLC-q-Orbitrap MS validation data in wheat flour matrix

**Table S3.** The validation data of the UHPLC-QqQ-MS method in wheat flour matrix. In detail, recovery (R%) rates, repeatability in terms of relative standard deviation% (RSD%) (0.004 mg Kg<sup>-1</sup> and 0.040 mg Kg<sup>-1</sup>, n = 6), limits of quantification (LOQ) and matrix effect (ME%).

| No | Analyte                  | Chemical group | Linear part (r <sup>2</sup> >0.99) | R% at 0.004 mg Kg <sup>-1</sup> | RSD% at 0.004 mg Kg <sup>-1</sup> | R% at 0.040 mg Kg <sup>-1</sup> | RSD% at 0.040 mg Kg <sup>-1</sup> | LOQ (mg Kg <sup>-1</sup> ) | ME% at 0.040 mg Kg <sup>-1</sup> |
|----|--------------------------|----------------|------------------------------------|---------------------------------|-----------------------------------|---------------------------------|-----------------------------------|----------------------------|----------------------------------|
| 1  | Acephate                 | OP             | 0.002-0.200                        | 75                              | 1                                 | 75                              | 2                                 | 0.002                      | 26                               |
| 2  | Aldicarb                 | CM             | 0.004-0.200                        | 87                              | 3                                 | 89                              | 3                                 | 0.004                      | 11                               |
| 3  | Aldicarb-sulfone         | CM             | 0.002-0.200                        | 80                              | 0                                 | 78                              | 4                                 | 0.002                      | 25                               |
| 4  | Aldicarb-sulfoxide       | CM             | 0.002-0.200                        | 83                              | 3                                 | 80                              | 4                                 | 0.002                      | 37                               |
| 5  | Azinphos-ethyl           | OP             | 0.002-0.200                        | 91                              | 5                                 | 91                              | 2                                 | 0.002                      | -1                               |
| 6  | Azinphos-methyl          | OP             | 0.002-0.200                        | 88                              | 5                                 | 90                              | 3                                 | 0.002                      | 1                                |
| 7  | Bendiocarb               | CM             | 0.002-0.200                        | 88                              | 5                                 | 90                              | 1                                 | 0.002                      | 5                                |
| 8  | Cadusafos                | OP             | 0.002-0.200                        | 88                              | 3                                 | 90                              | 2                                 | 0.002                      | 6                                |
| 9  | Carbaryl                 | CM             | 0.002-0.200                        | 88                              | 3                                 | 87                              | 1                                 | 0.002                      | 11                               |
| 10 | Carbofuran               | CM             | 0.002-0.200                        | 87                              | 3                                 | 89                              | 1                                 | 0.002                      | 6                                |
| 11 | Carbofuran-3-hydroxy     | CM             | 0.002-0.200                        | 82                              | 3                                 | 83                              | 4                                 | 0.002                      | 17                               |
| 12 | Carbophenothion          | OP             | 0.004-0.200                        | 81                              | 3                                 | 78                              | 2                                 | 0.004                      | 13                               |
| 13 | Chlorbufam               | CM             | 0.040-0.400                        | <LOQ                            | -                                 | 97                              | 4                                 | 0.040                      | 73                               |
| 14 | Chlorfenvinphos          | OP             | 0.002-0.200                        | 93                              | 5                                 | 91                              | 2                                 | 0.002                      | -9                               |
| 15 | Chlorpropham             | CM             | 0.02-0.400                         | <LOQ                            | -                                 | 93                              | 6                                 | 0.020                      | -1                               |
| 16 | Chlorpyrifos             | OP             | 0.004-0.200                        | 90                              | 5                                 | 85                              | 2                                 | 0.004                      | 6                                |
| 17 | Chlorpyrifos-methyl      | OP             | 0.010-0.200                        | <LOQ                            | -                                 | 90                              | 2                                 | 0.010                      | 9                                |
| 18 | Demeton-S-methyl         | OP             | 0.002-0.200                        | 78                              | 4                                 | 80                              | 3                                 | 0.002                      | 12                               |
| 19 | Demeton-S-methyl-sulfone | OP             | 0.002-0.200                        | 84                              | 4                                 | 82                              | 3                                 | 0.002                      | 31                               |
| 20 | Desmedipham              | CM             | 0.002-0.200                        | 88                              | 3                                 | 89                              | 2                                 | 0.002                      | 5                                |
| 21 | Diazinon                 | OP             | 0.002-0.200                        | 87                              | 5                                 | 89                              | 1                                 | 0.002                      | 8                                |
| 22 | Dichlorvos               | OP             | 0.004-0.200                        | 116                             | 14                                | 113                             | 3                                 | 0.004                      | 5                                |
| 23 | Dicrotophos              | OP             | 0.002-0.200                        | 85                              | 0                                 | 84                              | 2                                 | 0.002                      | 23                               |
| 24 | Diethofencarb            | CM             | 0.002-0.200                        | 89                              | 2                                 | 92                              | 2                                 | 0.002                      | -1                               |

|    |                         |    |             |      |   |    |   |       |     |
|----|-------------------------|----|-------------|------|---|----|---|-------|-----|
| 25 | Dimethoate              | OP | 0.002-0.200 | 83   | 3 | 84 | 1 | 0.002 | 18  |
| 26 | Disulfoton              | OP | 0.004-0.200 | 94   | 9 | 83 | 5 | 0.004 | 19  |
| 27 | Disulfoton-sulfone      | OP | 0.002-0.200 | 91   | 2 | 91 | 1 | 0.002 | -9  |
| 28 | Disulfoton-sulfoxide    | OP | 0.002-0.200 | 92   | 3 | 92 | 1 | 0.002 | 5   |
| 29 | EPN                     | OP | 0.010-0.200 | <LOQ | - | 95 | 3 | 0.010 | -8  |
| 30 | Ethiofencarb            | CM | 0.002-0.200 | 76   | 5 | 80 | 3 | 0.002 | 9   |
| 31 | Ethion                  | OP | 0.002-0.200 | 85   | 4 | 86 | 2 | 0.002 | 10  |
| 32 | Fenamiphos              | OP | 0.002-0.200 | 88   | 5 | 88 | 2 | 0.002 | 1   |
| 33 | Fenamiphos-sulfone      | OP | 0.002-0.200 | 89   | 4 | 90 | 0 | 0.002 | -11 |
| 34 | Fenamiphos-sulfoxid     | OP | 0.002-0.200 | 92   | 3 | 91 | 1 | 0.002 | -6  |
| 35 | Fenobucarb              | CM | 0.010-0.200 | <LOQ | - | 92 | 2 | 0.010 | 6   |
| 36 | Fenoxycarb              | CM | 0.002-0.200 | 86   | 6 | 86 | 1 | 0.002 | 2   |
| 37 | Fensulfothion           | OP | 0.002-0.200 | 92   | 4 | 92 | 4 | 0.002 | -5  |
| 38 | Fensulfothion-oxon      | OP | 0.002-0.200 | 86   | 2 | 86 | 3 | 0.002 | -2  |
| 39 | Fensulfothion-PO-sulfon | OP | 0.002-0.200 | 86   | 2 | 87 | 2 | 0.002 | -13 |
| 40 | Fensulfothion-sulfone   | OP | 0.002-0.200 | 93   | 3 | 91 | 1 | 0.002 | -23 |
| 41 | Fenthion                | OP | 0.004-0.200 | 90   | 4 | 90 | 2 | 0.004 | 1   |
| 42 | Fenthion-sulfone        | OP | 0.002-0.200 | 95   | 5 | 91 | 1 | 0.002 | -22 |
| 43 | Fenthion-sulfoxide      | OP | 0.002-0.200 | 88   | 3 | 90 | 1 | 0.002 | -5  |
| 44 | Fonofos                 | OP | 0.010-0.200 | <LOQ | - | 91 | 4 | 0.010 | 12  |
| 45 | Formetanate             | CM | 0.002-0.200 | 83   | 3 | 83 | 1 | 0.002 | 13  |
| 46 | Formothion              | OP | 0.004-0.200 | 84   | 2 | 83 | 2 | 0.004 | -7  |
| 47 | Fosthiazate             | OP | 0.002-0.200 | 91   | 2 | 90 | 2 | 0.002 | 6   |
| 48 | Furathiocarb            | CM | 0.002-0.200 | 90   | 4 | 92 | 1 | 0.002 | 3   |
| 49 | Heptenophos             | OP | 0.002-0.200 | 90   | 0 | 91 | 2 | 0.002 | 8   |
| 50 | Iprovalicarb            | CM | 0.002-0.200 | 91   | 4 | 91 | 2 | 0.002 | 3   |
| 51 | Isofenfos-methyl        | OP | 0.002-0.200 | 88   | 5 | 92 | 4 | 0.002 | 10  |
| 52 | Isofenphos              | OP | 0.002-0.200 | 93   | 6 | 94 | 3 | 0.002 | 12  |
| 53 | Isoproc carb            | CM | 0.004-0.200 | 92   | 3 | 89 | 2 | 0.004 | 2   |
| 54 | Malaoxon                | OP | 0.002-0.200 | 88   | 3 | 89 | 3 | 0.002 | 10  |
| 55 | Malathion               | OP | 0.002-0.200 | 92   | 3 | 90 | 2 | 0.002 | -1  |
| 56 | Mecarbam                | OP | 0.002-0.200 | 92   | 3 | 91 | 2 | 0.002 | 9   |



|    |                            |    |             |      |   |    |   |       |     |
|----|----------------------------|----|-------------|------|---|----|---|-------|-----|
| 57 | Methacrifos                | OP | 0.010-0.200 | <LOQ | - | 92 | 2 | 0.010 | 37  |
| 58 | Methamidophos              | OP | 0.002-0.200 | 70   | 0 | 70 | 1 | 0.002 | 11  |
| 59 | Methidathion               | OP | 0.002-0.200 | 88   | 3 | 89 | 3 | 0.002 | 6   |
| 60 | Methiocarb                 | CM | 0.002-0.200 | 91   | 2 | 90 | 3 | 0.002 | 5   |
| 61 | Methiocarb-sulfone         | CM | 0.002-0.200 | 85   | 4 | 85 | 1 | 0.002 | 9   |
| 62 | Methiocarb-sulfoxide       | CM | 0.002-0.200 | 82   | 3 | 82 | 2 | 0.002 | 19  |
| 63 | Methomyl                   | CM | 0.004-0.200 | 86   | 2 | 84 | 2 | 0.004 | 35  |
| 64 | Metolcarb                  | CM | 0.002-0.200 | 88   | 3 | 87 | 3 | 0.002 | 6   |
| 65 | Mevinphos (sum of isomers) | OP | 0.004-0.200 | 89   | 2 | 85 | 1 | 0.004 | 11  |
| 66 | Molinate                   | CM | 0.010-0.200 | <LOQ | - | 91 | 1 | 0.010 | 4   |
| 67 | Monocrotophos              | OP | 0.002-0.200 | 82   | 3 | 82 | 1 | 0.002 | 30  |
| 68 | Omethoate                  | OP | 0.002-0.200 | 78   | 4 | 78 | 2 | 0.002 | 26  |
| 69 | Oxamyl                     | CM | 0.002-0.200 | 81   | 3 | 79 | 3 | 0.002 | 65  |
| 70 | Phenmedipham               | CM | 0.002-0.200 | 89   | 4 | 89 | 2 | 0.002 | 2   |
| 71 | Phenthoate                 | OP | 0.002-0.200 | 90   | 4 | 91 | 1 | 0.002 | 1   |
| 72 | Phorate                    | OP | 0.004-0.200 | 88   | 6 | 91 | 4 | 0.004 | 11  |
| 73 | Phorate-sulfone            | OP | 0.002-0.200 | 87   | 3 | 89 | 2 | 0.002 | 2   |
| 74 | Phorate-sulfoxide          | OP | 0.002-0.200 | 90   | 0 | 89 | 2 | 0.002 | 6   |
| 75 | Phosalone                  | OP | 0.002-0.200 | 89   | 2 | 91 | 3 | 0.002 | 2   |
| 76 | Phosmet                    | OP | 0.002-0.200 | 90   | 0 | 92 | 1 | 0.002 | -7  |
| 77 | Phosphamidon               | OP | 0.002-0.200 | 89   | 2 | 90 | 1 | 0.002 | -80 |
| 78 | Phoxim                     | OP | 0.002-0.200 | 90   | 4 | 89 | 1 | 0.002 | -7  |
| 79 | Pirimicarb                 | CM | 0.002-0.200 | 88   | 3 | 89 | 1 | 0.002 | 4   |
| 80 | Pirimicarb-desmethyl       | CM | 0.002-0.200 | 84   | 2 | 82 | 3 | 0.002 | 20  |
| 81 | Pirimiphos-ethyl           | OP | 0.002-0.200 | 88   | 3 | 87 | 4 | 0.002 | 13  |
| 82 | Pirimiphos-methyl          | OP | 0.002-0.200 | 90   | 4 | 90 | 2 | 0.002 | 5   |
| 83 | Profenophos                | OP | 0.002-0.200 | 90   | 5 | 90 | 1 | 0.002 | -2  |
| 84 | Propamocarb                | CM | 0.002-0.200 | 83   | 3 | 79 | 2 | 0.002 | 22  |
| 85 | Propham                    | CM | 0.004-0.200 | 91   | 5 | 91 | 3 | 0.004 | 3   |
| 86 | Propoxur                   | CM | 0.002-0.200 | 89   | 2 | 90 | 1 | 0.002 | 10  |
| 87 | Prosulfocarb               | CM | 0.002-0.200 | 88   | 5 | 89 | 2 | 0.002 | -1  |
| 88 | Prothiofos                 | OP | 0.020-0.400 | <LOQ | - | 74 | 5 | 0.020 | 43  |

|    |                    |    |             |      |   |    |   |       |     |
|----|--------------------|----|-------------|------|---|----|---|-------|-----|
| 89 | Quinalphos         | OP | 0.002-0.200 | 92   | 4 | 90 | 2 | 0.002 | -1  |
| 90 | Sulfotep           | OP | 0.002-0.200 | 90   | 4 | 90 | 1 | 0.002 | 4   |
| 91 | Temephos           | OP | 0.002-0.200 | 89   | 7 | 86 | 2 | 0.002 | -19 |
| 92 | Terbufos           | OP | 0.002-0.200 | 91   | 5 | 89 | 3 | 0.002 | 5   |
| 93 | Terbufos-sulfone   | OP | 0.002-0.200 | 89   | 2 | 88 | 3 | 0.002 | 3   |
| 94 | Terbufos-sulfoxide | OP | 0.002-0.200 | 89   | 4 | 90 | 2 | 0.002 | 8   |
| 95 | Thiodicarb         | CM | 0.004-0.200 | 85   | 5 | 84 | 1 | 0.004 | 3   |
| 96 | Thiometon          | OP | 0.040-0.400 | <LOQ | - | 82 | 3 | 0.04  | 7   |
| 97 | Vamidotion         | OP | 0.002-0.200 | 83   | 3 | 84 | 2 | 0.002 | 18  |

\*OP= organophosphate & CM= carbamate
